RESEARCH ARTICLE

# Spatial and Temporal Trends in Insecticide Resistance among Malaria Vectors in Chad Highlight the Importance of Continual Monitoring

Geraldine Marie Foster<sup>1</sup>, Michael Coleman<sup>1</sup>, Edward Thomsen<sup>1</sup>, Hilary Ranson<sup>1\*</sup>, Elise Yangalbé-Kalnone<sup>2</sup>, Tchomfienet Moundai<sup>2</sup>, Israel Demba Kodindo<sup>2</sup>, Amen Nakebang<sup>2</sup>, Adoum Mahamat<sup>3</sup>, Mallaye Peka<sup>4</sup>, Clement Kerah-Hinzoumbé<sup>2</sup>

**1** Department of Vector Biology, Liverpool School of Tropical Medicine, Liverpool, United Kingdom, **2** Programme National de Lutte contre le Paludisme, N'Djamena, Chad, **3** Programme National de Lutte contre l'Onchocercose, Ministère de la Santé Publique, N'Djamena, Chad, **4** Programme National de Lutte contre la Trypanosomiase Humaine Africaine, Ministère de la Santé Publique, N'Djamena, Chad

\* [hilary.ranson@lstmed.ac.uk](mailto:hilary.ranson@lstmed.ac.uk)

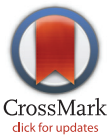

OPEN ACCESS

**Citation:** Foster GM, Coleman M, Thomsen E, Ranson H, Yangalbé-Kalnone E, Moundai T, et al. (2016) Spatial and Temporal Trends in Insecticide Resistance among Malaria Vectors in Chad Highlight the Importance of Continual Monitoring. PLoS ONE 11(5): e0155746. doi:10.1371/journal.pone.0155746

**Editor:** Kristin Michel, Kansas State University, UNITED STATES

**Received:** January 5, 2016

**Accepted:** May 3, 2016

**Published:** May 26, 2016

**Copyright:** © 2016 Foster et al. This is an open access article distributed under the terms of the [Creative Commons Attribution License](https://creativecommons.org/licenses/by/4.0/), which permits unrestricted use, distribution, and reproduction in any medium, provided the original author and source are credited.

**Data Availability Statement:** All relevant data are within the paper and its Supporting Information files.

**Funding:** This investigation received financial support from the UNICEF/UNDP/World Bank/WHO Special Programme for Research and Training in Tropical Diseases (WHO/TDR) (Grant AY0588). The funders had no role in study design, data collection and analysis, decision to publish, or preparation of the manuscript.

**Competing Interests:** The authors have declared that no competing interests exist.

## Abstract

### Background

A longitudinal *Anopheles gambiae* s.l. insecticide resistance monitoring programme was established in four sentinel sites in Chad 2008–2010. When this programme ended, only sporadic bioassays were performed in a small number of sites.

### Methods

WHO diagnostic dose assays were used to measure the prevalence of insecticide resistance to 0.1% bendiocarb, 4% DDT, 0.05% deltamethrin, 1% fenitrothion, and 0.75% permethrin in the main malaria vectors at the beginning and end of the malaria transmission season for three years 2008–2010, with subsequent collections in 2011 and 2014. Species and molecular identification of *An. gambiae* M and S forms and *kdr* genotyping was performed using PCR-RLFP; circumsporozoite status was assessed using ELISA.

### Results

Between 2008 and 2010, significant changes in insecticide resistance profiles to deltamethrin and permethrin were seen in 2 of the sites. No significant changes were seen in resistance to DDT in any site during the study period. Testing performed after the period of routine monitoring had ended showed dramatic increases to DDT and pyrethroid resistance in 3 sites. No resistance to organophosphate or carbamate insecticides was detected. *An. arabiensis* was the predominate member of the *An. gambiae* complex in all 4 sites; adult collections showed temporal variation in species composition in only 1 site. *Kdr* analysis identified both 1014F and 1014S alleles in *An. gambiae* S only. Circumsporozoite analysis

showed the highest vector infection rates were present in Donia, a site with extensive use of agricultural insecticides.

## Conclusions

During the monitoring gap of four years, significant changes occurred in resistance prevalence in 3 of the 4 sites ( $p = <0.001$ ), endangering the efficacy of currently implemented malaria control interventions. Significant changes in insecticide resistance profiles and a lack of *kdr* resistance alleles in adult populations highlight the urgent need for comprehensive entomological monitoring to be implemented and sustained in country.

## Introduction

Since 2000, the expansion of malaria control programmes has led to significant reductions in malaria morbidity and mortality [1]. Indoor residual spraying (IRS) and long lasting insecticide-treated bed nets (LLINs) are the most extensively implemented vector-reduction techniques, and the use of these interventions has led to a rapid scale-up in the use of insecticides as a tool for malaria control [1].

The pool of insecticides available for IRS and LLIN is critically limited. Twelve insecticides are currently approved by the World Health Organization (WHO) for IRS, belonging to just four chemical classes (organochlorines, organophosphates, carbamates and pyrethroids). For LLINs, the range of available insecticides is even more limited and currently only six pyrethroid insecticides are available (WHO pesticide evaluation scheme, <http://www.who.int/whopes/en/>).

Prolonged exposure to insecticides has inevitably led to the selection of insecticide resistance in the malaria vector, *Anopheles*, with the first reports of resistance to the organochlorine DDT in African malaria vectors emerging in the mid-20<sup>th</sup> century [2,3]. Pyrethroid resistance reports followed in 1993 [4], and is now widespread across Africa ([www.irmapper.com](http://www.irmapper.com)). Resistance to carbamates and organophosphates has been reported in Anopheline mosquitoes in several African countries and is spreading rapidly ([www.irmapper.com](http://www.irmapper.com)). Given the limited range of insecticides available, understanding the patterns and extent of resistance is vital for effective malaria control.

The WHO/TDR network for insecticide resistance in African malaria vectors was established in 2008 with the objective of improving the monitoring of insecticide resistance in malaria vectors, particularly in areas with large scale insecticide-based control programmes implemented or planned in the absence of data on vector susceptibility [5]. The network covered five countries (Angola, Burkina Faso, Benin, Chad and Sudan) and gathered biannual data over three years [5].

In Chad, 616,722 malaria cases were reported in 2012, an increase of over 200,000 cases since 2006 [6]. Overall, 80% of the population in Chad is at high risk of malaria [1]. Malaria transmission is seasonal and the main vectors are *An. arabiensis* and *An. gambiae* s.s. Both the M (*An. coluzzii*) and S forms of *An. gambiae* are present; minor vectors include *An. funestus*, *An. pharoensis* and *An. ziemanni* [7,8].

Currently, the most widely used vector control strategy in Chad is insecticide treated nets (ITNs), while IRS is planned for use in epidemic prone areas of the northern part of the country. Few studies assessing Anopheline resistance to insecticides have been performed in Chad. A study performed in 2006 looked at three districts where ITNs were implemented and found

evidence of increased tolerance to pyrethroid insecticides but full sensitivity to carbamates and organophosphates [9]. More recently, investigations into resistance mechanisms in pyrethroid-resistant mosquitoes collected from the capital, N'Djamena, found that resistance was largely conferred by a single locus and that target site resistance was absent in this population [10]. As there is a relatively high level of gene flow between *An. arabiensis* populations, particularly in area with extensive use of LLIN [11], monitoring insecticide resistance in Chad is recommended to ensure the continuing efficacy of currently implemented control interventions.

This paper reports a comprehensive analysis of multi-year, multi-site entomological and insecticide resistance data from Chad.

## Materials and Methods

### Study area

This study was performed as part of a wider WHO/TDR project established to monitor insecticide resistance in five countries in Africa [5]. Four sentinel sites were established in Chad for biannual resistance monitoring (Fig 1). Each site was in a malaria endemic region and boundaries were defined by a 10km radius from a public healthcare facility. Sites were chosen to fulfil a range of insecticide selection pressure criteria and included an urban agricultural site with local use of insecticides (N'djamena, N 12° 6', E 15° 02'), a rural site with intensive crop cultivation (Donia, N 8° 24', E 16° 24'), a site with a high coverage of insecticide-based malaria control interventions (Bongor, N 10° 16', E 15° 21') and a site with no intensive agriculture and no organized vector control programme (Mandelia, N 11° 43', E 15° 14'). The field sites were selected under the authority of the National Malaria Control Programme in Chad. No specific further permissions were required for the collection of either larval or adult mosquitoes from these sites and no endangered or protected species were involved.

### Mosquito collections

Sample collection times in each site were influenced by climate. In the semiarid sahelian zone (N'Djamena and Mandelia) there is a rainy season from June to September and a dry period from October to May. Sample collection times were July to early September. The humid soudanian zone (Bongor and Donia) has a rainy season between April and October. Sample collection dates here were late August to late October.

### Larval Collections and Insecticide Susceptibility Assays

Two rounds of mosquito collection were performed in July-August and September-October each year during which *Anopheles gambiae* s.l. were sampled as larvae from temporary water bodies encompassing the diversity of productive anopheline breeding sites within a 10km radius. Collections were performed over several days to minimize the probability of analysing siblings. All larval collections were pooled and reared to adult stage. Emerging mosquitoes were sexed, morphologically identified and non-blood fed, three to five day old females were used for susceptibility tests. Insecticide susceptibility tests were performed using WHO standard procedures and test kits for adult mosquitoes [12]. Briefly, a minimum of 100 mosquitoes were exposed to each insecticide for 1 hour, in batches of 20, during which the number of knocked down mosquitoes was recorded every five minutes. Following exposure, mosquitoes were transferred to holding tubes and supplied with a 10% sugar solution for 24h before scoring final mortality. A control tube with untreated papers was run simultaneously. Abbot's formula was used to correct mortality if necessary. Insecticides tested were: 0.1% bendiocarb, 4% DDT, 0.05% deltamethrin, 1% fenitrothion and 0.75% permethrin. Control

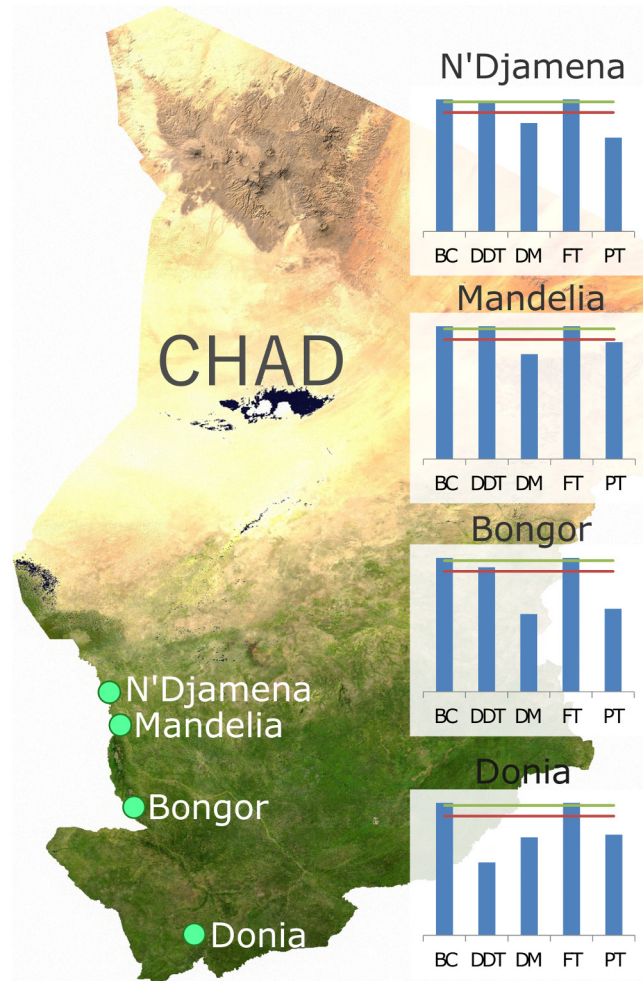

**Fig 1. Sentinel sites for biannual resistance monitoring.** Green dots indicate the geographic locations of each of the four sites. Sites were chosen to represent a range of different selection pressures for insecticide resistance. Embedded charts show the baseline percentage mortality for the year in which monitoring began (2008), where BC = bendiocarb, DDT = DDT, DM = deltamethrin, FT = Fenitrothion, and PT = Permethrin. Green lines represent 98% mortality and red lines indicate 90% mortality. Map source [https://commons.wikimedia.org/wiki/File:Chad\\_sat.jpg](https://commons.wikimedia.org/wiki/File:Chad_sat.jpg).

doi:10.1371/journal.pone.0155746.g001

mosquitoes as well as dead or alive specimens were individually stored in labelled tubes containing silica gel for molecular analysis. Quality control of each batch of WHO test papers was performed at the Liverpool School of Tropical Medicine using the *An. gambiae* Kisumu susceptible strain.

Tests for synergism with piperonyl butoxide (PBO) were conducted in conjunction with permethrin and deltamethrin. For each pyrethroid, 100 mosquitoes were exposed to 4% PBO for one hour then transferred immediately into tubes containing insecticide papers for a further one hour. Mortality was recorded after 24 hours in a same way as described above and compared to samples exposed directly to permethrin and deltamethrin papers. A PBO-only control was performed in conjunction with each test.

Following the six rounds of collections during 2008–2010, subsequent larval collections were performed in Donia (2011) and N'Djamena and Bongor (2014).

## Adult collections

Two rounds of collection of adult *Anopheles* mosquitoes were performed each year in each site between July 2008 and October 2010, timed to coincide with the peak of the malaria transmission season. Indoor collections were performed using pyrethrum spray catches (PSC) in 15 randomly selected houses and from window exit traps (ET) attached to nine randomly selected PSC houses. PSC were performed in all sites in each collection round and exit trap collections were performed in rounds 4, 5 and 6 only. In each selected house, one trap was installed overnight (ET1) and another in the morning after removal of the first trap (ET2). Outdoor collections were performed using pit traps in all six rounds of collection. Two pit traps were placed in each of the four sites. All specimens were classified according to their abdominal appearance and scored as unfed, blood-fed, semi-gravid or gravid and later preserved in labelled vials containing silica gel.

## Molecular identification, detection of *kdr* mutations and vector status determination

Sub-samples of 40 mosquitoes drawn from bioassay control mosquitoes were identified using PCR-RFLP [13] following DNA extraction [14]. Genotype at the *kdr* locus was determined using PCR assays described by Martinez-Torres et al [15] and Ranson et al [16]. Genotyping for the *ace1*<sup>R</sup> mutations was performed according to the method in Weill et al [17].

Mosquitoes collected resting indoors, outdoors or exiting from houses were analysed for *Plasmodium falciparum* circumsporozoite status using enzyme-linked immuno-sorbent assays (ELISA) to determine vector status [18]. The sporozoite rate (SR) was calculated as the proportion of mosquitoes positive for *P. falciparum* circumsporozoite protein out of the total tested.

## Data analysis

Bioassay data were stratified by insecticide, location, collection round and year for analysis. Mortality rates for each insecticide were defined using WHO guidelines whereby resistant populations displayed less than 90% mortality, potentially resistant populations showed 90–98% mortality, and susceptible showed mortality greater than 98% [12]. Confidence limits (95%) were calculated using Microsoft Excel and bioassay mortalities were compared using Fisher's exact test, using pooled data from both rounds of testing. The z-test was used to compare the proportions of molecular forms. Genotypic frequencies at the *kdr* locus were compared with Hardy-Weinberg proportions using the exact test procedures implemented in Genepop 3.4 software [19]. As mortalities in the control groups were less than 5%, no corrections using Abbot's formula were required.

## Results

### Insecticide Bioassays

Between 2008 and 2010, no resistance to bendiocarb or fenitrothion was detected in any sentinel site (data not shown). In N'Djamena, Mandelia and Bongor, populations were either fully susceptible to DDT or a low prevalence of resistance was observed (Fig 2a). Results from Donia showed resistance to DDT in every collection round. Despite the constant presence of resistance to DDT in Donia, no significant change over the study period was observed overall ( $p = 0.866$ , Table 1). A subsequent collection performed in Donia in 2011 showed that mortality to DDT had further declined to 32%. Additional collections in 2014 were performed in N'Djamena and Bongor, which showed a dramatic decrease in susceptibility to DDT to 0% and 24%, respectively (Fig 2a, Table 1,  $p = <0.001$ ).

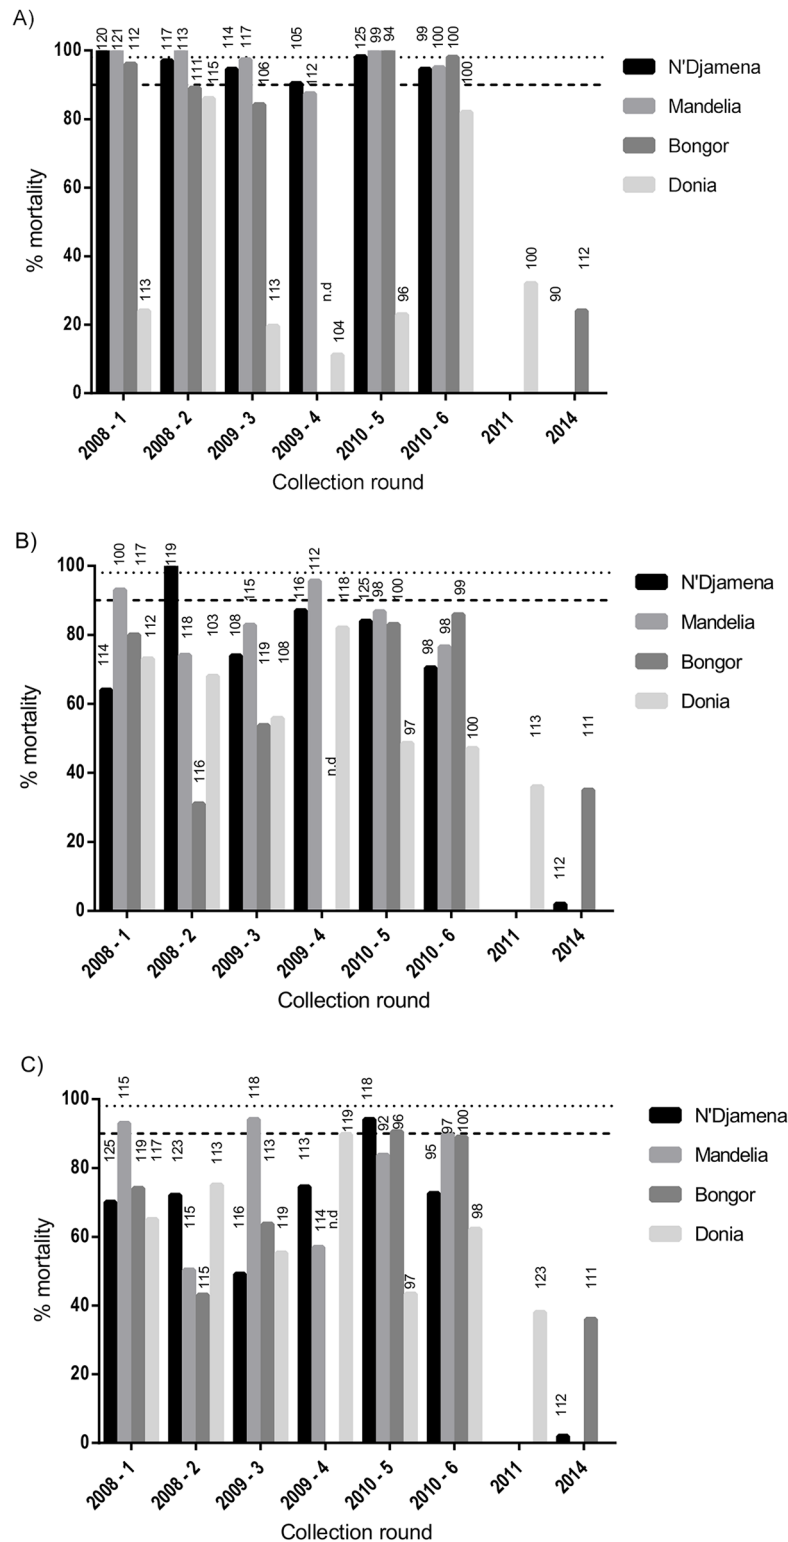

**Fig 2. Results from insecticide resistance bioassays.** A) DDT; B) Deltamethrin; C) Permethrin. No round 4 data from Bongor was available owing to the early end of the rainy season in 2009. Numbers in each column represent the number of mosquitoes exposed to insecticide paper. Data from 2008 have been published previously and are included for comparison.

doi:10.1371/journal.pone.0155746.g002

**Table 1. Insecticide bioassay results for *Anopheles gambiae* s.l. in 2008, 2010 and 2014 in four sentinel sites in Chad.**

| Insecticide  | Site     | 2008 mortality (95% CI) | 2010 mortality (95% CI) | 2014 mortality (95% CI) | p (2008 vs. 2010) | p (2010 vs. 2014) | p (2008 vs. 2014) |
|--------------|----------|-------------------------|-------------------------|-------------------------|-------------------|-------------------|-------------------|
| Deltamethrin | Ndjamena | 82 (70–94)              | 78 (66–90)              | 2 (0–5)                 | 0.726             | <0.001            | <0.001            |
|              | Mandelia | 79 (68–90)              | 82 (72–91)              |                         | 0.883             |                   |                   |
|              | Bongor   | 58 (39–77)              | 84 (78–100)             | 35 (33–37)              | <b>0.013</b>      | <0.001            | <b>0.035</b>      |
|              | Donia    | 74 (69–12)              | 48 (40–56)              |                         | <b>0.006</b>      |                   |                   |
| Permethrin   | Ndjamena | 71 (63–79)              | 84 (70–98)              | 2 (0–5)                 | 0.204             | <0.001            | <0.001            |
|              | Mandelia | 88 (84–92)              | 86 (76–96)              |                         | 1                 |                   |                   |
|              | Bongor   | 62 (51–73)              | 90 (86–94)              | 36 (32–40)              | <b>0.015</b>      | <0.001            | <b>0.022</b>      |
|              | Donia    | 76 (70–82)              | 53 (40–67)              |                         | <b>0.024</b>      |                   |                   |
| DDT          | Ndjamena | 98 (96–100)             | 97 (93–100)             | 0 (-)                   | 0.947             | <0.001            | <0.001            |
|              | Mandelia | 100 (-)                 | 98 (95–100)             |                         | 0.891             |                   |                   |
|              | Bongor   | 93 (88–98)              | 97 (94–100)             | 24 (21–27)              | 0.780             | <0.001            | <0.001            |
|              | Donia    | 55 (35–75)              | 53 (30–76)              |                         | 0.866             |                   |                   |

Data from biannual collections was pooled for analysis. P values were calculated using Fisher’s exact test, using absolute numbers of mosquitoes. Between 2008 and 2010 the prevalence of resistance in Bongor to deltamethrin and permethrin decreased, but this had rebounded by 2014.

doi:10.1371/journal.pone.0155746.t001

No significant change in resistance to permethrin or deltamethrin was observed in N’Djamena and Mandelia during the 3 year study period (permethrin:  $p = 0.204$  and  $p = 1$ , respectively; deltamethrin:  $p = 0.726$  and  $p = 0.883$ , respectively; [Table 1](#)). However, collections in N’Djamena in 2014, four years after routine monitoring had ceased, showed a significant decrease in mortality to both insecticides (2%,  $p = <0.001$ ; [Table 1](#)).

Significant changes to pyrethroid resistance were observed in Bongor and Donia during the study period ([Table 1](#)). In Bongor, there were significant increases in mortality to both deltamethrin and permethrin between 2008 and 2010 ( $p = 0.013$  and  $p = 0.015$ , respectively; [Table 1](#)); in Donia, the opposite effect was observed, and a significant decrease in mortality to both pyrethroid insecticides was observed between 2008 and 2010 ( $p = 0.006$  and  $p = 0.024$ ; [Table 1](#)). The collection in Donia in 2011 following the end of the routine monitoring period showed a continuing decrease in mortality to deltamethrin and permethrin ([Fig 2B](#), 36% and 38%, respectively), and collections made in Bongor in 2014 showed a significant decrease in mortality compared to 2010 and 2008 ([Table 1](#)).

Prior exposure of mosquito populations to PBO was performed in 2009 and 2010 and restored full susceptibility to permethrin and deltamethrin to populations from N’Djamena, Mandelia and Bongor ([S1 Table](#)). Populations from Donia could only be tested in one instance in 2009 using deltamethrin; this showed partial restoration of susceptibility (97.4% from 82.2%).

### Molecular Identification and kdr genotyping of control mosquitoes

Overall, 629 unexposed *An. gambiae* s.l. mosquitoes were identified to species level ([S2 Table](#)). In 2008 and 2010, *An. arabiensis* was the predominant species collected in N’Djamena, Mandelia and Bongor. The M form of *An. gambiae* s.s. was observed in low numbers in Bongor in 2008 and N’Djamena in 2010, however was found consistently in Donia throughout the collection period in 2008 and 2009. The S form of *An. gambiae* was only found in Donia. No significant difference was seen in the composition of mosquito populations between the start and the end of the transmission season, with the exception of Donia in 2009 ( $p = <0.001$ , [Table 2](#)).

**Table 2. Molecular identification of unexposed *An. gambiae* s.l. mosquitoes collected in six rounds of collection between 2008 and 2010.**

| Year                 | Locality  | Round 1 collections   |      |                      | Round 2 collections   |      |                | Difference between start and end of season (p) |
|----------------------|-----------|-----------------------|------|----------------------|-----------------------|------|----------------|------------------------------------------------|
|                      |           | Species               | N    | Proportion (%)       | Species               | N    | Proportion (%) |                                                |
| 2008                 | N'Djaména | <i>An. arabiensis</i> | 40   | 100.0                | <i>An. arabiensis</i> | 37   | 100.0          | 1                                              |
|                      | Mandéla   | <i>An. arabiensis</i> | 39   | 100.0                | <i>An. arabiensis</i> | 39   | 100.0          | 1                                              |
|                      |           | <i>An. arabiensis</i> | 37   | 94.9                 | <i>An. arabiensis</i> | 40   | 100.0          | 0.241                                          |
|                      | Bongor    | <i>An. gambiae</i> M  | 3    | 7.7                  |                       |      |                |                                                |
|                      |           | <i>An. arabiensis</i> | 3    | 8.3                  | <i>An. arabiensis</i> | 9    | 23.7           | 0.090                                          |
|                      | Donia     | <i>An. gambiae</i> M  | 14   | 38.9                 | <i>An. gambiae</i> M  | 17   | 44.7           |                                                |
| <i>An. gambiae</i> S |           | 19                    | 52.8 | <i>An. gambiae</i> S | 12                    | 31.6 |                |                                                |
| 2009                 | Donia     | <i>An. arabiensis</i> | 1    | 2.5                  | <i>An. arabiensis</i> | 27   | 67.5           | <0.001                                         |
|                      |           | <i>An. gambiae</i> M  | 7    | 17.5                 | <i>An. gambiae</i> M  | 7    | 17.5           |                                                |
| 2010                 | N'Djaména | <i>An. gambiae</i> S  | 32   | 80.0                 | <i>An. gambiae</i> S  | 6    | 15.0           |                                                |
|                      |           | <i>An. arabiensis</i> | 40   | 100.0                | <i>An. arabiensis</i> | 39   | 97.5           | 1                                              |
|                      |           |                       |      |                      | <i>An. gambiae</i> M  | 1    | 2.5            |                                                |
|                      | Mandéla   | <i>An. arabiensis</i> | 40   | 100.0                | <i>An. arabiensis</i> | 40   | 100.0          | 1                                              |
|                      | Bongor    | <i>An. arabiensis</i> | 40   | 100.0                | <i>An. arabiensis</i> | 40   | 100.0          | 1                                              |

*An. arabiensis* was consistently the predominant species in N'Djaména, Mandéla and Bongor.

doi:10.1371/journal.pone.0155746.t002

Genotyping of control mosquitoes collected in 2008 and 2010 showed no *An. arabiensis* or *An. gambiae* M with *kdr* mutations or the *Ace-1R* mutation in any site (n = 560, S2 Table). However, both 1014F and 1014S *kdr* mutations were found in Donia in *An. gambiae* S in 2008 (no molecular testing performed in 2009, and no collections performed in Donia in 2010). The frequencies of the two mutations were quite similar and were higher at the beginning [f(Ser) = f(Phe) = 0.37] than at the end [f(Ser) = f(Phe) = 0.13] of the rainy season (Table 3). All possible genotypes were observed at the *kdr* locus and in some cases, both mutations occurred in the same individual.

### Adult collections

Overall, 7,308 anopheline mosquitoes were collected from PSC, Pit and Exit traps, comprising seven species (*An. gambiae* s.l., *An. funestus*, *An. pharoensis*, *An. rufipes*, *An. nili*, *An. squamosus*, *An. ziemanni*). Of these, 5,168 mosquitoes were morphologically identified as *An. gambiae* s.l. (4,353 from PSC, 86 from Pit traps, 700 from ET1 and 29 from ET2, respectively) and 339 as *An. funestus* (292 from PSC, 0 from Pit traps, 36 from ET1 and 11 from ET2, respectively). *An. gambiae* s.l. was consistently the predominant species collected from PSC during the first

**Table 3. *kdr* mutations frequencies among pools of unexposed *An. gambiae* M and *An. gambiae* S collected in 2008 and 2010 in three sites.**

| Collections | Localities | Species              | N  | Genotype at the <i>kdr</i> locus |         |         |         |         |         | f (Ser) | f (Phe) |
|-------------|------------|----------------------|----|----------------------------------|---------|---------|---------|---------|---------|---------|---------|
|             |            |                      |    | Leu-Leu                          | Leu-Phe | Phe-Phe | Leu-Ser | Ser-Ser | Phe-Ser |         |         |
| Round 1     | Bongor     | <i>An. gambiae</i> M | 3  | 3                                | 0       | 0       | 0       | 0       | 0       | 0       | 0       |
|             | Donia      | <i>An. gambiae</i> M | 14 | 14                               | 0       | 0       | 0       | 0       | 0       | 0       | 0       |
|             |            | <i>An. gambiae</i> S | 19 | 1                                | 4       | 3       | 4       | 3       | 4       | 0.37    | 0.37    |
| Round 2     | Donia      | <i>An. gambiae</i> M | 17 | 17                               | 0       | 0       | 0       | 0       | 0       | 0       | 0       |
|             |            | <i>An. gambiae</i> S | 12 | 6                                | 3       | 0       | 3       | 3       | 3       | 0.13    | 0.13    |
| Round 6     | N'Djaména  | <i>An. gambiae</i> M | 1  | 1                                | 0       | 0       | 0       | 0       | 0       | 0       | 0       |

doi:10.1371/journal.pone.0155746.t003



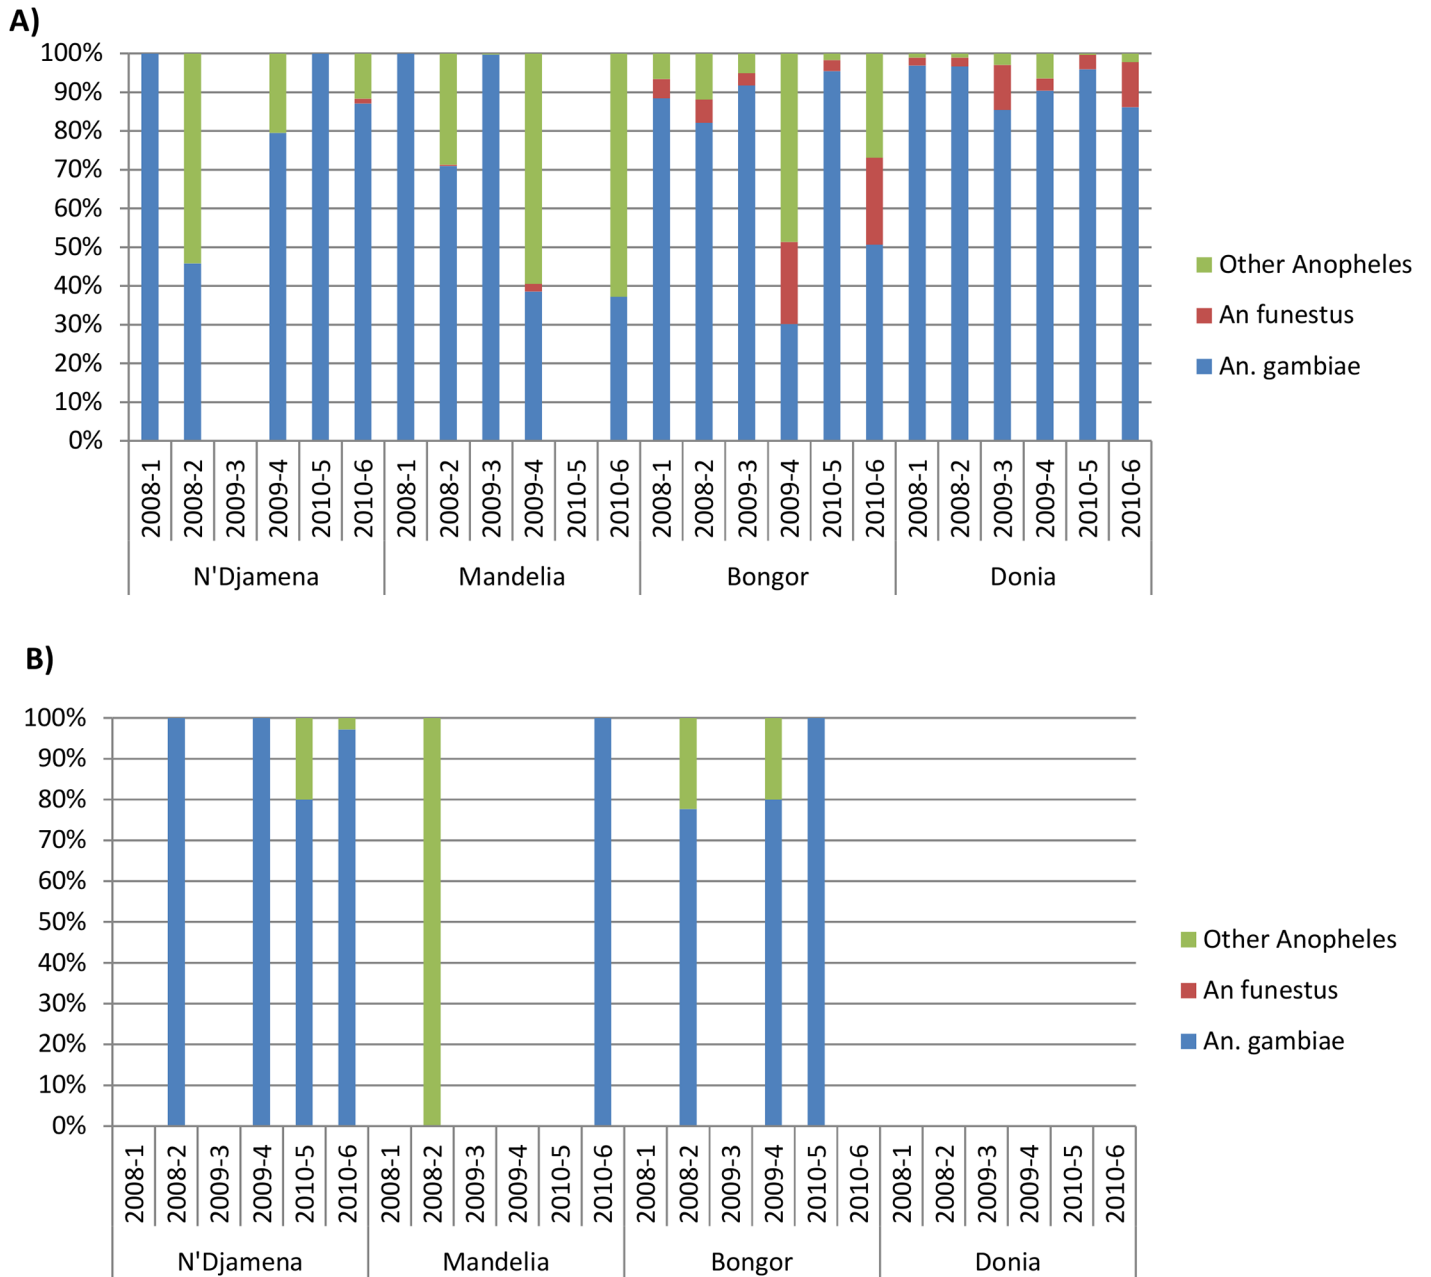

**Fig 3. Results from adult collections.** A) PSC B) Pit traps. Different coloured series represent different species: Green = Other Anopheles; Red = *An. funestus*; Blue = *An. gambiae*.

doi:10.1371/journal.pone.0155746.g003

collection round of each year in each site in N'Djamena, Mandelia and Bongor (Fig 3a); in Donia, the proportion of *An. gambiae* s.l. collected was consistent in each collection round. Few mosquitoes were collected from outdoor traps (Fig 3b). When mosquitoes were collected, *An. gambiae* s.l. was consistently the predominant species found in N'Djamena and Bongor, and the only one collected in Mandelia. No Anopheline mosquitoes were collected outdoors in Donia whatever the sampling period.

### Sporozoite analysis

Overall, 2,749 Anopheline mosquitoes collected in 2008 and 2010 were tested for *P. falciparum* circumsporozoite protein (Table 4). Infected *An. gambiae* s.l. were found in one collection round in Bongor in 2008 (SR = 0.5%) and in N'Djamena in 2010 (SR = 2.5%), however the highest infection rates were seen in Donia, where infected vectors were found in all four collection rounds (2008 SR = 7.5% and 15.5%; 2010 SR = 11.5% and 13.8%, respectively); no significant difference was seen between the numbers of infected vectors found at the start and end of the rainy season in either year (2008:  $p = 0.096$ ; 2010  $p = 0.69$ ). Across all sites, there was no significant difference seen between the number of infected mosquitoes at the end of each rainy season ( $p = 0.80$ ) or between the start and end of the rainy season in 2010 ( $p = 0.69$ ); however, the number of infected mosquitoes at the end of the rainy season in 2008 was significantly higher than the number of infected mosquitoes at the start of the rainy season ( $p = 0.03$ ).

One specimen of *An. funestus* was infected in Bongor in 2008 (SR = 6.2%). Infected *An. funestus* mosquitoes were found in Donia in both collection rounds in 2010 (SR round 1 = 7.9%, SR round 2 = 10%) but not in any other sentinel sites. Of the complementary vectors tested, low numbers of infected *An. pharoensis* were found in Bongor in the first collection round of 2010 and *An. nili* in Donia in the first collection round of 2010. No infected secondary vectors were found at the end of the rainy season.

**Table 4. Circumsporozoite analysis from 2008 and 2010.**

| Year | Locality                  | CSP status | Round 1 collections     |                     | Round 2 collections     |                     |
|------|---------------------------|------------|-------------------------|---------------------|-------------------------|---------------------|
|      |                           |            | <i>An. gambiae</i> s.l. | <i>An. funestus</i> | <i>An. gambiae</i> s.l. | <i>An. funestus</i> |
| 2008 | N'djamena                 | N          | 21                      | 0                   | 11                      | 0                   |
|      |                           | N+         | 0                       | -                   | 0                       | -                   |
|      |                           | SI         | 0                       | -                   | 0                       | -                   |
|      | Bongor                    | N          | 200                     | 16                  | 172                     | 57                  |
|      |                           | N+         | 1                       | 1                   | 0                       | 0                   |
|      |                           | SI         | 0.5                     | 6.2                 | 0                       | 0                   |
|      |                           | N          | 200                     | 7                   | 200                     | 13                  |
|      | Donia                     | N+         | 15                      | 0                   | 31                      | 0                   |
|      |                           | SI         | 7.5                     | 0                   | 15.5                    | 0                   |
|      | Total infected mosquitoes |            |                         | 17                  |                         | 31                  |
| 2010 | N'Djamena                 | N          | 103                     | 0                   | 283                     | 2                   |
|      |                           | N+         | 0                       | -                   | 7                       | 0                   |
|      |                           | SI         | 0                       | -                   | 2.5                     | 0                   |
|      | Bongor                    | N          | 327                     | 12                  | 130                     | 44                  |
|      |                           | N+         | 0                       | 0                   | 0                       | 0                   |
|      |                           | SI         | 0                       | 0                   | 0                       | 0                   |
|      |                           | N          | 217                     | 38                  | 80                      | 10                  |
|      | Donia                     | N+         | 25                      | 3                   | 11                      | 1                   |
|      |                           | SI         | 11.5                    | 7.9                 | 13.8                    | 10                  |
|      | Total infected mosquitoes |            |                         | 28                  |                         | 19                  |

N denotes the number of mosquitoes collected, N+ denotes the number of infected mosquitoes, and SI indicates the sporozoite index. The highest rates of infection were seen in Donia in both years.

doi:10.1371/journal.pone.0155746.t004

## Discussion

In 2012, there were nearly 10 million people at risk of malaria in Chad and the country reported approximately 600,000 malaria cases [1]. Although ITNs and LLINs have been distributed free of charge since 2003 as the main vector control intervention, it is impossible to assess the success or otherwise of the programme, and to track trends in malaria incidence and insecticide resistance, without the collection of basic entomological data, including the composition and distribution of vector species and regular monitoring of their insecticide resistance status [1]. The WHO/TDR network for insecticide resistance in African malaria vectors was designed to elucidate trends in insecticide resistance and malaria vectors in five African countries and this report represents the first study of trends in vector composition and insecticide resistance from Chad.

Four sentinel sites with different selective pressures for insecticide resistance were selected and bioassays to detect insecticide resistance were performed biannually between 2008 and 2010. Following the routine monitoring period, additional collections were performed in selected sites in 2011 and 2014. During the routine monitoring period, the site with the greatest exposure to insecticide, Donia, showed the highest overall levels of insecticide resistance to DDT, deltamethrin and permethrin; a subsequent collection made in 2011 following the end of routine monitoring showed further decreases to mortality from these insecticides. Dramatic decreases in susceptibility to DDT and pyrethroid insecticides, after the end of the routine monitoring period, were detected in N'djamena (the capital city of the country) and Bongor. The first one is an urban agriculture site where pyrethroid insecticides are regularly applied for crops protection and for domestic use. In Bongor, a high coverage of insecticide-based malaria control interventions was implemented for several years. As the pyrethroid insecticides are the only class of insecticides currently approved for use in LLINs, Chad's main malaria control intervention, these results require urgent investigation to determine the operational consequences of this resistance [20].

Both DDT and pyrethroid insecticides target the voltage gated sodium channel, and target site mutations (*kdr*) result in cross-resistance between compounds. *An. arabiensis* was predominantly found in N'Djamena, Mandelia and Bongor, whilst in Donia, *An. gambiae* M and S molecular forms were identified. *An. gambiae* S form was the only species to carry *kdr* alleles, with both 1014F and 1014S alleles being detected, in some cases in the same individual. The presence of the 1014F allele in *An. gambiae* S from Donia suggests that this allele may be widely distributed in the southern parts of Chad, in line with previous observations [9].

The absence of target site mutations in the *An. arabiensis* populations that were characterised indicates that a metabolic based mechanism may be present in this species in southern Chad. Testing performed with the synergist PBO, an inhibitor of cytochrome P450 enzymes, either fully or partially restored mortalities to deltamethrin and permethrin in mosquito populations from all four study sites; further evidence implicating P450-mediated resistance in *An. arabiensis* in Chad was found by biochemical analysis and genetic mapping studies on populations collected in N'Djamena [10]. As previous studies in this region have found extensive gene flow between *An. arabiensis* populations 300km apart [11], this suggests that this form of resistance could spread rapidly throughout the country. Metabolic based resistance is increasingly being observed in Africa [20] and is a concern as this type of resistance has been associated with malaria programme failure [21]. Understanding this resistance will allow for the implementation of an Insecticide Resistance Management Plan as outlined by GPIRM [22].

As expected, given that all collections were made during the rainy season, all adult Anopheline mosquito collections were comprised predominantly of *An. gambiae* s.l. [23,24]. However, consistently fewer *An. gambiae* were collected in the late rainy season compared to the early rainy season, which is unexpected given previous data from south-Western Chad that show

*An. arabiensis* peaks in October and May [7]. Although *An. funestus* was collected in indoor catches in Bongor and Donia in 2009 and 2010, overall it was not abundant. This supports earlier findings in Chad that the breeding habitats for this species are becoming less frequent due to continuing local environmental modifications [7].

Of the Anopheline mosquitoes tested for *P. falciparum* circumsporozoite protein, the highest infection rate was seen in Donia (15.5% and 13.8% in 2008 and 2010, respectively, [Table 4](#)), the site with extensive agricultural use of pyrethroid insecticides and the highest levels of insecticide resistance ([Fig 2](#)). This is much higher than in a previous study performed in Chad [7] and in a comparable study performed in two Sahelian regions in Niger in 2007, which found sporozoite rates of 3.0% in *An. gambiae* s.l. in sites with crop cultivation but no malaria control interventions [25]. This could be partly explained by an overestimation of sporozoite rate using the ELISA method [26], but the rates seen in Donia are higher than this correction factor allows. Sporozoite prevalence can vary from location to location, however a recent study hypothesised that rates of mosquito infection are resilient to changes in endemicity, which could have implications for the further deployment of transmission-reducing interventions in Chad [27].

All of the sites in this study were located in the south of Chad, where the distribution of LLINs is the current malaria intervention strategy. Given that collections made after the end of the routine monitoring period showed rapid increases to pyrethroid resistance, there is a need to investigate whether the levels of insecticide resistance seen in the bioassays have translated to compromised efficacy, so that strategies to mitigate the effects of this resistance can be implemented [20,28]. One such strategy may be the use of PBO-treated LLINs, as the use of PBO synergised resistance in all four study sites, and these nets have showed increased efficacy against pyrethroid resistant populations compared to conventionally-treated LLINs [29].

During the monitoring gap of four years, significant changes occurred in resistance prevalence in 3 of the 4 sites ( $p = <0.001$ ), endangering the efficacy of currently implemented malaria control interventions. Significant changes in insecticide resistance profiles and a lack of *kdr* resistance alleles in adult populations highlight the urgent need for comprehensive entomological monitoring to be implemented and maintained in country along with the development of an insecticide resistance management plan [22,30–32].

## Supporting Information

**S1 Table. Percentage mortality in bioassay tests.**

(PDF)

**S2 Table. *An. gambiae* species distribution and *kdr* genotyping results for all sites over three years of routine monitoring.**

(PDF)

## Acknowledgments

This study received financial support from the UNICEF/UNDP/World Bank/WHO Special Programme for Research and Training in Tropical Diseases (WHO/TDR) (Grant AY0588). We would like to acknowledge the support of Frédéric Simard, Fabrice Chandre, Vincent Corbel, Roch Dabiré, Filomeno Fortes and Joao Pinto, who all contributed towards the establishment of the WHO/TDR network and supported its activities.

## Author Contributions

Conceived and designed the experiments: HR CKH. Performed the experiments: EYK AN AM TM IDK MP. Analyzed the data: GF CKH AN HR ET. Wrote the paper: GF CKH HR MC ET.

## References

1. World Health Organization, Tuschman M, World Health Organization, Global Malaria Programme. World malaria report 2013. 2013.
2. Brown AW. The insecticide-resistance problem: a review of developments in 1956 and 1957. *Bull World Health Organ.* 1958; 18: 309–321. PMID: [13536795](#)
3. Hamon J, Subra R, Sales S, Coz J. [Presence in the southwestern part of Upper Volta of a population of *Anopheles gambiae* "A" resistant to DDT]. *Médecine Trop Rev Corps Santé Colon.* 1968; 28: 521–528.
4. Elissa N, Mouchet J, Rivière F, Meunier JY, Yao K. Resistance of *Anopheles gambiae* ss to pyrethroids in Côte d'Ivoire. *ANNALES-SOCIETE BELGE DE MEDECINE TROPICALE. INSTITUTE OF TROPICAL MEDICINE*; 1993. pp. 291–291. Available: <http://lib.itg.be/open/asbmt/1993/1993asbm0291.pdf>.
5. Ranson H, Abdallah H, Badolo A, Guelbeogo WM, Kerah-Hinzoumbé C, Yangalbé-Kalnoné E, et al. Insecticide resistance in *Anopheles gambiae*: data from the first year of a multi-country study highlight the extent of the problem. *Malar J.* 2009; 8: 299. doi: [10.1186/1475-2875-8-299](#) PMID: [20015411](#)
6. Plan National de Développement Sanitaire II (PNDS2) 2013–2015, Version du 11 Novembre 2013 revue OMS [Internet]. 2013. Available: <http://www.sante-tchad.org/file/151097>.
7. Kerah-Hinzoumbé C, Péka M, Antonio-Nkondjio C, Donan-Gouni I, Awono-Ambene P, Samè-Ekobo A, et al. Malaria vectors and transmission dynamics in Goulmoun, a rural city in south-western Chad. *BMC Infect Dis.* 2009; 9: 71. doi: [10.1186/1471-2334-9-71](#) PMID: [19463189](#)
8. Coetzee M, Hunt RH, Wilkerson R, Della Torre A, Coulibaly MB, Besansky NJ. *Anopheles coluzzii* and *Anopheles amharicus*, new members of the *Anopheles gambiae* complex. *Zootaxa.* 2013; 3619: 246–274. PMID: [26131476](#)
9. Kerah-Hinzoumbé C, Péka M, Nwane P, Donan-Gouni I, Etang J, Samè-Ekobo A, et al. Insecticide resistance in *Anopheles gambiae* from south-western Chad, Central Africa. *Malar J.* 2008; 7: 192. doi: [10.1186/1475-2875-7-192](#) PMID: [18823537](#)
10. Witzig C, Parry M, Morgan JC, Irving H, Steven A, Cuamba N, et al. Genetic mapping identifies a major locus spanning P450 clusters associated with pyrethroid resistance in *kdr*-free *Anopheles arabiensis* from Chad. *Heredity.* 2013; 110: 389–397. doi: [10.1038/hdy.2012.112](#) PMID: [23299100](#)
11. Wondji C, Simard F, Lehmann T, Fondjo E, Samè-Ekobo A, Fontenille D. Impact of insecticide-treated bed nets implementation on the genetic structure of *Anopheles arabiensis* in an area of irrigated rice fields in the Sahelian region of Cameroon. *Mol Ecol.* 2005; 14: 3683–3693. doi: [10.1111/j.1365-294X.2005.02699.x](#) PMID: [16202089](#)
12. WHO. Test procedures: for insecticide resistance monitoring in malaria vector mosquitoes. Geneva: World Health Organization; 2013.
13. Fanello C, Santolamazza F, Della Torre A. Simultaneous identification of species and molecular forms of the *Anopheles gambiae* complex by PCR-RFLP. *Med Vet Entomol.* 2002; 16: 461–464. doi: [10.1046/j.1365-2915.2002.00393.x](#) PMID: [12510902](#)
14. Paskewitz SM, Collins FH. Use of the polymerase chain reaction to identify mosquito species of the *Anopheles gambiae* complex. *Med Vet Entomol.* 1990; 4: 367–373. PMID: [2133004](#)
15. Martinez-Torres D, Chandre F, Williamson MS, Darriet F, Bergé JB, Devonshire AL, et al. Molecular characterization of pyrethroid knockdown resistance (*kdr*) in the major malaria vector *Anopheles gambiae* s.s. *Insect Mol Biol.* 1998; 7: 179–184. doi: [10.1046/j.1365-2583.1998.72062.x](#) PMID: [9535162](#)
16. Ranson H, Jensen B, Vulule JM, Wang X, Hemingway J, Collins FH. Identification of a point mutation in the voltage-gated sodium channel gene of Kenyan *Anopheles gambiae* associated with resistance to DDT and pyrethroids. *Insect Mol Biol.* 2000; 9: 491–497. doi: [10.1046/j.1365-2583.2000.00209.x](#) PMID: [11029667](#)
17. Weill M, Malcolm C, Chandre F, Mogensen K, Berthomieu A, Marquine M, et al. The unique mutation in *ace-1* giving high insecticide resistance is easily detectable in mosquito vectors. *Insect Mol Biol.* 2004; 13: 1–7. PMID: [14728661](#)
18. Wirtz RA, Burkot TR, Graves PM, Andre RG. Field Evaluation of Enzyme-linked Immunosorbent Assays for *Plasmodium falciparum* and *Plasmodium vivax* Sporozoites in Mosquitoes (Diptera: Culicidae) from Papua New Guinea. *J Med Entomol.* 1987; 24: 433–437. doi: [10.1093/jmedent/24.4.433](#) PMID: [3305949](#)
19. Raymond M, Rousset F. GENEPOP (Version 1.2): Population Genetics Software for Exact Tests and Ecumenicism. *J Hered.* 1995; 86: 248–249.
20. Ranson H, N'Guessan R, Lines J, Moiroux N, Nkuni Z, Corbel V. Pyrethroid resistance in African anopheline mosquitoes: what are the implications for malaria control? *Trends Parasitol.* 2011; 27: 91–98. doi: [10.1016/j.pt.2010.08.004](#) PMID: [20843745](#)

21. Hargreaves K, Koekemoer LL, Brooke BD, Hunt RH, Mthembu J, Coetzee M. Anopheles funestus resistant to pyrethroid insecticides in South Africa. *Med Vet Entomol.* 2000; 14: 181–189. PMID: [10872862](#)
22. World Health Organization, World Health Organization, editors. Global plan for insecticide resistance management in malaria vectors. Geneva, Switzerland: World Health Organization; 2012.
23. Coetzee M, Craig M, le Sueur D. Distribution of African Malaria Mosquitoes Belonging to the Anopheles gambiae Complex. *Parasitol Today.* 2000; 16: 74–77. doi: [10.1016/S0169-4758\(99\)01563-X](#) PMID: [10652493](#)
24. Costantini C, Ayala D, Guelbeogo WM, Pombi M, Some CY, Bassole IH, et al. Living at the edge: biogeographic patterns of habitat segregation conform to speciation by niche expansion in Anopheles gambiae. *BMC Ecol.* 2009; 9: 16. doi: [10.1186/1472-6785-9-16](#) PMID: [19460144](#)
25. Labbo R, Czeher C, Djibrila A, Arzika I, Jeanne I, Duchemin J-B. Longitudinal follow-up of malaria transmission dynamics in two villages in a Sahelian area of Niger during a nationwide insecticide-treated bednet distribution programme. *Med Vet Entomol.* 2012; 26: 386–395. doi: [10.1111/j.1365-2915.2012.01011.x](#) PMID: [22680979](#)
26. Fontenille D, Lochouart L, Diagne N, Sokhna C, Lemasson JJ, Diatta M, et al. High annual and seasonal variations in malaria transmission by anophelines and vector species composition in Dielmo, a holoendemic area in Senegal. *Am J Trop Med Hyg.* 1997; 56: 247–253. PMID: [9129525](#)
27. Churcher TS, Trape J-F, Cohuet A. Human-to-mosquito transmission efficiency increases as malaria is controlled. *Nat Commun.* 2015; 6. doi: [10.1038/ncomms7054](#)
28. Jones CM, Sanou A, Guelbeogo WM, Sagnon N, Johnson PC, Ranson H. Aging partially restores the efficacy of malaria vector control in insecticide-resistant populations of Anopheles gambiae s.l. from Burkina Faso. *Malar J.* 2012; 11: 10–1186.
29. Tungu P, Magesa S, Maxwell C, Malima R, Masue D, Sudi W, et al. Evaluation of PermaNet 3.0 a deltamethrin-PBO combination net against Anopheles gambiae and pyrethroid resistant Culex quinquefasciatus mosquitoes: an experimental hut trial in Tanzania. *Malar J.* 2010; 9: 21. doi: [10.1186/1475-2875-9-21](#) PMID: [20085631](#)
30. Hemingway J, Vontas J, Poupardin R, Raman J, Schwabe C, et al. Country-level operational implementation of the Global Plan for Insecticide Resistance Management. *Proc Natl Acad Sci U S A.* 2013; 110: 9397–9402. doi: [10.1073/pnas.1307656110](#) PMID: [23696658](#)
31. Mnzava AP, Knox TB, Temu EA, Trett A, Fornadel C, Hemingway J, et al. Implementation of the global plan for insecticide resistance management in malaria vectors: progress, challenges and the way forward. *Malar J.* 2015; 14: 173. doi: [10.1186/s12936-015-0693-4](#) PMID: [25899397](#)
32. Thomsen EK, Strode C, Hemmings K, Hughes AJ, Chanda E, Musapa M, et al. Underpinning sustainable vector control through informed insecticide resistance management. *PloS One.* 2014; 9: e99822. doi: [10.1371/journal.pone.0099822](#) PMID: [24932861](#)
